# Supplementary material for: Vanadium uptake and storage in the fabrication and function of mussel byssus
Source: Royal Society of Chemistry journal article supplement (doi:10.1039/d4nj02546f), 2024-01-01
Supplement: d4nj02546f1.pdf [file d4nj02546f1.pdf]

## Supporting Information

### Vanadium uptake and storage in the fabrication and function of mussel byssus

Samantha Jee, Mostafa Rammal, Tobias Priemel, D. Scott Bohle, Matthew J. Harrington

Dept. of Chemistry, McGill University, 801 Sherbrooke Street West, Montreal, Quebec H3A 0B8, Canada

**Table S1.** Tukey post hoc test letter grouping table for the 540 cm<sup>-1</sup> resonant peak position.

| 540 cm <sup>-1</sup> Peak |        |              |
|---------------------------|--------|--------------|
| Group                     | Mean   | Group letter |
| Fe-treated                | 556.05 | A            |
| Native                    | 555.51 | A B          |
| V-treated                 | 554.29 | B            |

**Table S2.** Tukey post hoc test letter grouping table for the 590 cm<sup>-1</sup> resonant peak position.

| 590 cm <sup>-1</sup> Peak |        |              |
|---------------------------|--------|--------------|
| Group                     | Mean   | Group letter |
| Native                    | 602.01 | A            |
| Fe-treated                | 602.64 | A            |
| V-treated                 | 600.69 | B            |

**Table S3.** Tukey post hoc test letter grouping table for the 640 cm<sup>-1</sup> resonant peak position.

| 640 cm <sup>-1</sup> Peak |        |              |
|---------------------------|--------|--------------|
| Group                     | Mean   | Group letter |
| Native                    | 644.98 | A            |
| Fe-treated                | 644.75 | A            |
| V-treated                 | 643.43 | B            |

**Table S4.** Tukey post hoc test letter grouping table for the 1480 cm<sup>-1</sup> resonant peak position.

| 1480 cm <sup>-1</sup> Peak |         |              |
|----------------------------|---------|--------------|
| Group                      | Mean    | Group letter |
| Native                     | 1479.91 | A            |
| Fe-treated                 | 1478.87 | B            |
| V-treated                  | 1477.48 | C            |

**Figure S1.** Boxplots showing the distribution of Raman shift peak positions for four of the metal-DOPA resonant peaks after metal-loading experiments.

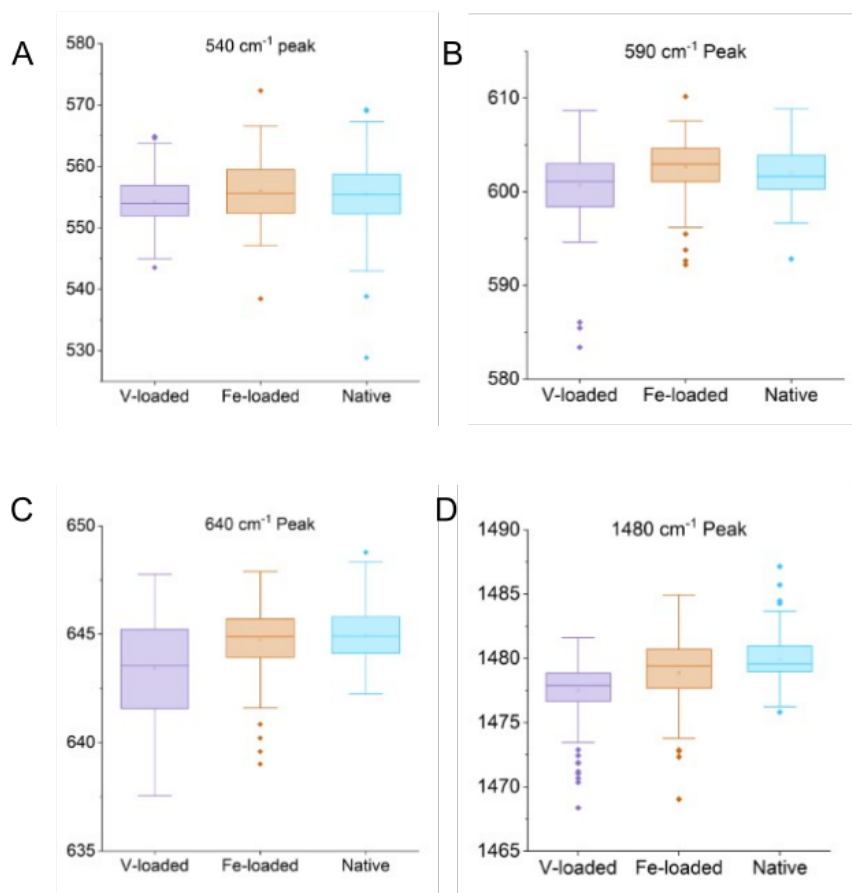

**Table S5.**  $[\text{V}(\text{cat})_3]^{2-}$  vibrational modes<sup>a</sup>, cc-PVTZ, B3LYP

| Mode number | Frequency ( $\text{cm}^{-1}$ ) | Infrared <sup>b</sup> activity | Raman <sup>c</sup> activity | Depolar-P <sup>d</sup> | Depolar-U <sup>d</sup> |
|-------------|--------------------------------|--------------------------------|-----------------------------|------------------------|------------------------|
| 1           | 26.35                          | 0.0392                         | 21.811                      | 0.75                   | 0.8571                 |
| 2           | 26.44                          | 0.0394                         | 21.7853                     | 0.75                   | 0.8571                 |
| 3           | 54.53                          | 0.154                          | 0.0017                      | 0.7401                 | 0.8507                 |
| 4           | 67.36                          | 0.0043                         | 6.9063                      | 0.75                   | 0.8571                 |
| 5           | 67.52                          | 0.0045                         | 6.9721                      | 0.75                   | 0.8571                 |
| 6           | 69.61                          | 0                              | 11.2627                     | 0.7347                 | 0.8471                 |
| 7           | 150.8                          | 0.3486                         | 0                           | 0.7037                 | 0.8261                 |
| 8           | 175.63                         | 0.0122                         | 0.9168                      | 0.75                   | 0.8571                 |
| 9           | 175.64                         | 0.0125                         | 0.9071                      | 0.75                   | 0.8571                 |
| 10          | 216.66                         | 0.0001                         | 61.66                       | 0.1455                 | 0.2541                 |
| 11          | 220.6                          | 0.1265                         | 1.465                       | 0.73                   | 0.844                  |
| 12          | 220.64                         | 0.1424                         | 0.5069                      | 0.7451                 | 0.8539                 |

|    |        |          |          |        |        |
|----|--------|----------|----------|--------|--------|
| 14 | 229.07 | 0.1464   | 0.4962   | 0.7492 | 0.8566 |
| 15 | 233.63 | 0        | 73.3909  | 0.0786 | 0.1457 |
| 16 | 310.78 | 11.9267  | 0        | 0.2043 | 0.3392 |
| 17 | 326.27 | 11.1682  | 6.6378   | 0.75   | 0.8571 |
| 18 | 326.29 | 11.1703  | 6.619    | 0.75   | 0.8571 |
| 19 | 363.24 | 22.0614  | 0        | 0.643  | 0.7827 |
| 20 | 420.49 | 96.1125  | 84.3857  | 0.75   | 0.8571 |
| 21 | 420.53 | 96.1715  | 84.3142  | 0.75   | 0.8571 |
| 22 | 456.41 | 0.1203   | 0.001    | 0.7308 | 0.8444 |
| 23 | 460.08 | 9.4864   | 13.6828  | 0.75   | 0.8571 |
| 24 | 460.14 | 9.5356   | 13.7011  | 0.75   | 0.8571 |
| 25 | 509.62 | 190.8363 | 12.5309  | 0.75   | 0.8571 |
| 26 | 509.68 | 190.722  | 12.5737  | 0.75   | 0.8571 |
| 27 | 539.86 | 23.0429  | 0.8406   | 0.7499 | 0.8571 |
| 28 | 539.88 | 23.0778  | 0.843    | 0.7488 | 0.8564 |
| 29 | 546.27 | 0.0006   | 103.5251 | 0.1278 | 0.2266 |
| 30 | 556.21 | 8.5082   | 0        | 0.34   | 0.5075 |
| 31 | 580.07 | 0.0552   | 0.1771   | 0.7484 | 0.8561 |
| 32 | 580.1  | 0.0552   | 0.1831   | 0.7113 | 0.8313 |
| 33 | 580.46 | 0.0002   | 2.5148   | 0.1167 | 0.209  |
| 34 | 611.95 | 0.0098   | 14.419   | 0.75   | 0.8571 |
| 35 | 611.97 | 0.0111   | 14.3985  | 0.75   | 0.8571 |
| 36 | 623.62 | 24.6709  | 0.0007   | 0.232  | 0.3767 |
| 37 | 631.81 | 208.8342 | 58.3652  | 0.7498 | 0.857  |
| 38 | 631.84 | 208.9867 | 58.3458  | 0.7499 | 0.8571 |
| 39 | 634.15 | 0.0074   | 424.8396 | 0.0824 | 0.1523 |
| 40 | 709.4  | 34.567   | 0.0196   | 0.75   | 0.8571 |
| 41 | 709.66 | 71.3656  | 1.5695   | 0.75   | 0.8571 |
| 42 | 709.71 | 71.1978  | 1.5631   | 0.75   | 0.8571 |
| 43 | 743.3  | 0.0416   | 0.3212   | 0.7357 | 0.8477 |
| 44 | 743.32 | 0.0429   | 0.3158   | 0.7489 | 0.8564 |
| 45 | 743.6  | 0.0001   | 3.6715   | 0.2903 | 0.4499 |
| 46 | 817.63 | 51.1175  | 1.9875   | 0.75   | 0.8571 |
| 47 | 817.64 | 51.0664  | 1.9849   | 0.75   | 0.8571 |
| 48 | 820.55 | 0.0002   | 23.4099  | 0.1343 | 0.2368 |
| 49 | 832.39 | 0.2144   | 0.1646   | 0.7458 | 0.8544 |
| 50 | 832.41 | 0.2128   | 0.1658   | 0.7448 | 0.8538 |
| 51 | 832.76 | 0.0004   | 1.4751   | 0.2162 | 0.3555 |
| 52 | 867.77 | 5.887    | 0.0012   | 0.7482 | 0.8559 |
| 53 | 868.03 | 17.9329  | 0.3656   | 0.75   | 0.8571 |
| 54 | 868.05 | 17.9437  | 0.3669   | 0.75   | 0.8571 |
| 55 | 877.51 | 0.0064   | 0.0249   | 0.7354 | 0.8476 |
| 56 | 877.54 | 0.0048   | 0.0362   | 0.7227 | 0.8391 |

|    |         |          |           |        |        |
|----|---------|----------|-----------|--------|--------|
| 57 | 877.58  | 0.0021   | 0.0715    | 0.7099 | 0.8303 |
| 58 | 886.34  | 10.3309  | 17.4045   | 0.75   | 0.8571 |
| 59 | 886.34  | 10.3377  | 17.4011   | 0.75   | 0.8571 |
| 60 | 891.76  | 31.2344  | 0         | 0.1872 | 0.3154 |
| 61 | 1029.93 | 44.9505  | 3.5577    | 0.7404 | 0.8508 |
| 62 | 1029.95 | 44.9671  | 3.5427    | 0.7467 | 0.855  |
| 63 | 1030.53 | 0.0271   | 59.2415   | 0.0001 | 0.0002 |
| 64 | 1106.14 | 3.2912   | 0.2609    | 0.75   | 0.8571 |
| 65 | 1106.16 | 3.2448   | 0.2611    | 0.75   | 0.8571 |
| 66 | 1106.35 | 25.5676  | 0.0007    | 0.7495 | 0.8568 |
| 67 | 1154.99 | 1.1696   | 27.9111   | 0.7481 | 0.8559 |
| 68 | 1155    | 1.1651   | 27.8739   | 0.75   | 0.8571 |
| 69 | 1155.25 | 0.0006   | 83.5264   | 0.0203 | 0.0398 |
| 70 | 1248.36 | 0.1424   | 5.2129    | 0.75   | 0.8571 |
| 71 | 1248.38 | 0.1415   | 5.2086    | 0.75   | 0.8571 |
| 72 | 1249.14 | 8.0317   | 0.0018    | 0.7491 | 0.8566 |
| 73 | 1294.27 | 804.572  | 237.3995  | 0.75   | 0.8571 |
| 74 | 1294.28 | 805.9971 | 237.4786  | 0.75   | 0.8571 |
| 75 | 1301.13 | 62.3139  | 2.9465    | 0.749  | 0.8565 |
| 76 | 1301.15 | 64.8247  | 3.1824    | 0.7498 | 0.857  |
| 77 | 1308.96 | 5.8541   | 0.0188    | 0.1232 | 0.2194 |
| 78 | 1314.41 | 0.0001   | 989.2231  | 0.1022 | 0.1854 |
| 79 | 1374.28 | 31.254   | 305.3321  | 0.75   | 0.8571 |
| 80 | 1374.31 | 31.2571  | 305.1775  | 0.7496 | 0.8569 |
| 81 | 1375.64 | 0.0039   | 915.0554  | 0.1172 | 0.2098 |
| 82 | 1471.29 | 1.1855   | 5.8077    | 0.75   | 0.8571 |
| 83 | 1471.34 | 1.202    | 5.8241    | 0.75   | 0.8571 |
| 84 | 1473.5  | 1.5522   | 0.0021    | 0.4443 | 0.6153 |
| 85 | 1502.51 | 383.3384 | 835.6203  | 0.75   | 0.8571 |
| 86 | 1502.55 | 383.1508 | 835.8682  | 0.75   | 0.8571 |
| 87 | 1511.15 | 0.0027   | 2751.5026 | 0.118  | 0.2111 |
| 88 | 1580.35 | 16.4229  | 101.8891  | 0.75   | 0.8571 |
| 89 | 1580.36 | 16.4056  | 101.961   | 0.75   | 0.8571 |
| 90 | 1586.52 | 21.835   | 0.0006    | 0.5502 | 0.7098 |
| 91 | 1594.08 | 14.0545  | 12.2631   | 0.7499 | 0.8571 |
| 92 | 1594.09 | 14.0164  | 12.2791   | 0.7499 | 0.8571 |
| 93 | 1594.57 | 0.0043   | 17.2402   | 0.3317 | 0.4982 |
| 94 | 3106.29 | 3.2572   | 124.3313  | 0.75   | 0.8571 |
| 95 | 3106.31 | 2.9417   | 126.8255  | 0.75   | 0.8571 |
| 96 | 3106.34 | 16.7181  | 19.7795   | 0.75   | 0.8571 |
| 97 | 3126.55 | 142.0859 | 261.4359  | 0.7481 | 0.8559 |
| 98 | 3126.57 | 141.8124 | 261.8342  | 0.7454 | 0.8541 |
| 99 | 3126.76 | 0.7591   | 534.3331  | 0.2944 | 0.4549 |

|            |         |          |          |        |        |
|------------|---------|----------|----------|--------|--------|
| <b>100</b> | 3146.6  | 28.4256  | 131.5636 | 0.7499 | 0.8571 |
| <b>101</b> | 3146.64 | 32.138   | 129.9132 | 0.75   | 0.8571 |
| <b>102</b> | 3146.86 | 226.1507 | 4.1569   | 0.75   | 0.8571 |
| <b>103</b> | 3152.88 | 108.0629 | 113.8415 | 0.7483 | 0.856  |
| <b>104</b> | 3152.91 | 107.4153 | 115.0805 | 0.7428 | 0.8524 |
| <b>105</b> | 3153.69 | 0.0963   | 929.4497 | 0.025  | 0.0487 |

- a.  $C_1$  point symmetry
- b. IR Activity in KM/mol
- c. Raman activity  $\text{\AA}^4/\text{AMU}$
- d. Depolarization ratios

**Table S6.**  $[\text{Fe}(\text{cat})_3]^{3-}$  vibrational modes<sup>a</sup>, cc-PVTZ, B3LYP

| Mode number | Frequency (cm <sup>-1</sup> ) | Infrared <sup>b</sup> Activity | Raman <sup>c</sup> Activity | Depolar-P <sup>d</sup> | Depolar-U <sup>d</sup> |
|-------------|-------------------------------|--------------------------------|-----------------------------|------------------------|------------------------|
| 1           | 26.76                         | 0.0065                         | 19.2172                     | 0.75                   | 0.8571                 |
| 2           | 26.95                         | 0.0068                         | 19.1258                     | 0.75                   | 0.8571                 |
| 3           | 45.78                         | 0.0037                         | 0.001                       | 0.7482                 | 0.856                  |
| 4           | 58.13                         | 0.0285                         | 7.0287                      | 0.75                   | 0.8571                 |
| 5           | 58.91                         | 0.028                          | 7.1502                      | 0.75                   | 0.8571                 |
| 6           | 65.66                         | 0.0001                         | 11.7491                     | 0.7457                 | 0.8543                 |
| 7           | 131.03                        | 0.0324                         | 0.0001                      | 0.2167                 | 0.3562                 |
| 8           | 156.8                         | 0.2561                         | 2.974                       | 0.75                   | 0.8571                 |
| 9           | 156.85                        | 0.2621                         | 2.9805                      | 0.75                   | 0.8571                 |
| 10          | 168.95                        | 0.5142                         | 0.221                       | 0.7488                 | 0.8564                 |
| 11          | 169.05                        | 0.5019                         | 0.2179                      | 0.7495                 | 0.8568                 |
| 12          | 179.15                        | 0                              | 108.3624                    | 0.135                  | 0.2379                 |
| 13          | 199.4                         | 0.0759                         | 5.552                       | 0.7489                 | 0.8564                 |
| 14          | 199.65                        | 0.0776                         | 5.5219                      | 0.7499                 | 0.857                  |
| 15          | 207.85                        | 0.0001                         | 31.886                      | 0.0455                 | 0.087                  |
| 16          | 242.12                        | 36.3547                        | 0.0002                      | 0.199                  | 0.3319                 |
| 17          | 293.78                        | 153.3847                       | 20.0123                     | 0.75                   | 0.8571                 |
| 18          | 293.85                        | 152.9398                       | 19.9555                     | 0.75                   | 0.8571                 |
| 19          | 308.91                        | 0.3282                         | 0.0001                      | 0.709                  | 0.8297                 |
| 20          | 331.04                        | 91.6672                        | 23.7354                     | 0.75                   | 0.8571                 |
| 21          | 331.14                        | 91.9608                        | 23.8188                     | 0.75                   | 0.8571                 |
| 22          | 457.9                         | 0.1512                         | 0.0019                      | 0.7389                 | 0.8498                 |
| 23          | 459.4                         | 0.4478                         | 1.081                       | 0.75                   | 0.8571                 |
| 24          | 459.49                        | 0.4601                         | 1.0881                      | 0.7499                 | 0.8571                 |
| 25          | 477.03                        | 103.9167                       | 28.7528                     | 0.75                   | 0.8571                 |
| 26          | 477.05                        | 103.9692                       | 28.7711                     | 0.75                   | 0.8571                 |
| 27          | 498                           | 0.0001                         | 163.6887                    | 0.1173                 | 0.21                   |
| 28          | 505.28                        | 2.6065                         | 0.527                       | 0.746                  | 0.8545                 |
| 29          | 505.36                        | 2.607                          | 0.5306                      | 0.7493                 | 0.8567                 |
| 30          | 515.22                        | 2.4979                         | 0.0001                      | 0.5536                 | 0.7126                 |
| 31          | 544.73                        | 0.043                          | 0.6495                      | 0.7403                 | 0.8508                 |
| 32          | 544.75                        | 0.0429                         | 0.6616                      | 0.7101                 | 0.8305                 |
| 33          | 544.89                        | 0.0006                         | 2.2826                      | 0.0889                 | 0.1632                 |
| 34          | 597.06                        | 4.5632                         | 8.6282                      | 0.7499                 | 0.8571                 |
| 35          | 597.09                        | 4.2023                         | 8.8685                      | 0.7498                 | 0.857                  |
| 36          | 598.2                         | 5.4461                         | 0.0147                      | 0.7328                 | 0.8458                 |
| 37          | 599.56                        | 62.2371                        | 23.457                      | 0.7499                 | 0.8571                 |
| 38          | 599.59                        | 61.8773                        | 23.6917                     | 0.75                   | 0.8571                 |

|    |         |          |          |        |        |
|----|---------|----------|----------|--------|--------|
| 39 | 604.17  | 0.0002   | 193.4576 | 0.0692 | 0.1294 |
| 40 | 660.47  | 30.7815  | 0.3296   | 0.75   | 0.8571 |
| 41 | 660.81  | 54.9749  | 4.1026   | 0.75   | 0.8571 |
| 42 | 660.91  | 57.0017  | 4.4121   | 0.75   | 0.8571 |
| 43 | 698.13  | 0.1542   | 1.0296   | 0.5989 | 0.7492 |
| 44 | 698.19  | 0.1327   | 1.6275   | 0.5229 | 0.6867 |
| 45 | 698.26  | 0.0375   | 5.4804   | 0.4405 | 0.6116 |
| 46 | 784.03  | 2.4482   | 1.8616   | 0.7492 | 0.8566 |
| 47 | 784.04  | 2.4383   | 1.86     | 0.7498 | 0.857  |
| 48 | 785.35  | 0.0001   | 38.5357  | 0.0185 | 0.0364 |
| 49 | 811.17  | 0.1425   | 1.7332   | 0.672  | 0.8038 |
| 50 | 811.3   | 0.144    | 1.6856   | 0.7388 | 0.8498 |
| 51 | 811.44  | 0.0164   | 2.2631   | 0.2196 | 0.3602 |
| 52 | 818.51  | 15.8124  | 0.0293   | 0.75   | 0.8571 |
| 53 | 819.2   | 33.6403  | 1.7611   | 0.75   | 0.8571 |
| 54 | 819.31  | 33.9228  | 1.7791   | 0.75   | 0.8571 |
| 55 | 822.93  | 0.0498   | 0.0907   | 0.1505 | 0.2616 |
| 56 | 822.95  | 0.0372   | 0.1731   | 0.1538 | 0.2667 |
| 57 | 823     | 0.0299   | 0.2416   | 0.1532 | 0.2657 |
| 58 | 885.87  | 13.9998  | 20.194   | 0.75   | 0.8571 |
| 59 | 885.89  | 13.9799  | 20.2033  | 0.75   | 0.8571 |
| 60 | 889.59  | 55.8435  | 0.0002   | 0.7336 | 0.8463 |
| 61 | 1026.68 | 48.9314  | 3.0963   | 0.7485 | 0.8562 |
| 62 | 1026.69 | 48.9686  | 3.0982   | 0.7483 | 0.8561 |
| 63 | 1027.25 | 0.0084   | 46.3319  | 0.0045 | 0.0089 |
| 64 | 1089.83 | 7.1304   | 0.8461   | 0.75   | 0.8571 |
| 65 | 1089.9  | 5.5741   | 0.9016   | 0.75   | 0.8571 |
| 66 | 1089.99 | 30.4707  | 0.0826   | 0.7498 | 0.857  |
| 67 | 1139.51 | 3.1186   | 17.1207  | 0.3614 | 0.5309 |
| 68 | 1139.58 | 3.516    | 12.3415  | 0.7195 | 0.8369 |
| 69 | 1139.63 | 0.4583   | 47.4193  | 0.0144 | 0.0283 |
| 70 | 1235.38 | 0.8894   | 0.2131   | 0.75   | 0.8571 |
| 71 | 1235.45 | 0.6097   | 0.234    | 0.75   | 0.8571 |
| 72 | 1235.5  | 2.9684   | 0.0432   | 0.75   | 0.8571 |
| 73 | 1302.38 | 986.425  | 0.2635   | 0.7471 | 0.8552 |
| 74 | 1302.42 | 986.3534 | 0.2609   | 0.7498 | 0.857  |
| 75 | 1321.04 | 0.0011   | 156.7014 | 0.1104 | 0.1988 |
| 76 | 1326.01 | 6.2591   | 0.2483   | 0.7482 | 0.856  |
| 77 | 1326.07 | 6.3708   | 0.254    | 0.7469 | 0.8551 |
| 78 | 1330.98 | 19.4021  | 0.0002   | 0.1074 | 0.194  |
| 79 | 1357.54 | 102.1748 | 281.6387 | 0.7497 | 0.8569 |

|            |         |          |          |        |        |
|------------|---------|----------|----------|--------|--------|
| <b>80</b>  | 1357.58 | 102.3315 | 281.5852 | 0.7499 | 0.8571 |
| <b>81</b>  | 1359.9  | 0.0148   | 939.3981 | 0.1166 | 0.2089 |
| <b>82</b>  | 1456.26 | 2.2349   | 9.6568   | 0.75   | 0.8571 |
| <b>83</b>  | 1456.33 | 2.2311   | 9.6603   | 0.75   | 0.8571 |
| <b>84</b>  | 1458.07 | 1.462    | 0.0069   | 0.7156 | 0.8343 |
| <b>85</b>  | 1515.37 | 870.313  | 810.3455 | 0.75   | 0.8571 |
| <b>86</b>  | 1515.38 | 871.0246 | 810.3938 | 0.75   | 0.8571 |
| <b>87</b>  | 1527.97 | 0.0014   | 3728.133 | 0.1054 | 0.1906 |
| <b>88</b>  | 1549.34 | 20.9762  | 161.6298 | 0.75   | 0.8571 |
| <b>89</b>  | 1549.35 | 21.2236  | 161.1464 | 0.75   | 0.8571 |
| <b>90</b>  | 1554.8  | 75.1937  | 0.0063   | 0.2007 | 0.3343 |
| <b>91</b>  | 1568.82 | 28.2356  | 4.1023   | 0.7499 | 0.8571 |
| <b>92</b>  | 1568.84 | 28.142   | 4.1206   | 0.7495 | 0.8568 |
| <b>93</b>  | 1569.32 | 0.0086   | 3.728    | 0.1821 | 0.3081 |
| <b>94</b>  | 3054.99 | 5.9285   | 173.6292 | 0.75   | 0.8571 |
| <b>95</b>  | 3055.01 | 13.577   | 129.8415 | 0.75   | 0.8571 |
| <b>96</b>  | 3055.06 | 25.3645  | 63.0427  | 0.75   | 0.8571 |
| <b>97</b>  | 3079.91 | 280.4427 | 291.1623 | 0.7474 | 0.8555 |
| <b>98</b>  | 3079.96 | 279.7737 | 292.6659 | 0.7428 | 0.8525 |
| <b>99</b>  | 3080.31 | 2.029    | 637.7959 | 0.285  | 0.4436 |
| <b>100</b> | 3106.69 | 68.9638  | 112.3333 | 0.75   | 0.8571 |
| <b>101</b> | 3106.8  | 60.1792  | 114.9857 | 0.75   | 0.8571 |
| <b>102</b> | 3107.12 | 428.1522 | 3.4345   | 0.7493 | 0.8567 |
| <b>103</b> | 3114.86 | 150.9566 | 140.9911 | 0.7311 | 0.8446 |
| <b>104</b> | 3114.94 | 150.6563 | 139.4222 | 0.7493 | 0.8567 |
| <b>105</b> | 3115.99 | 0.3355   | 987.0647 | 0.0302 | 0.0586 |

- a.  $C_1$  point symmetry
- b. IR Activity in KM/mol
- c. Raman activity  $\text{\AA}^4/\text{AMU}$
- d. Depolarization ratios
